# Supplementary material for: Redox-sensitive activation of CCL7 by BRG1 in hepatocytes during liver injury
Source: PubMed Central journal article supplement — Redox Biol. 2021 Jul 24;46:102079. doi: 10.1016/j.redox.2021.102079 (PMC8406035; doi:10.1016/j.redox.2021.102079), 2021-07-24
Supplement: mmc1.pdf [file mmc1.pdf]

**Kong M et al: Redox-sensitive activation of CCL7 by BRG1 in hepatocytes contributes to macrophage infiltration during liver injury**  
**Online supplementary material**

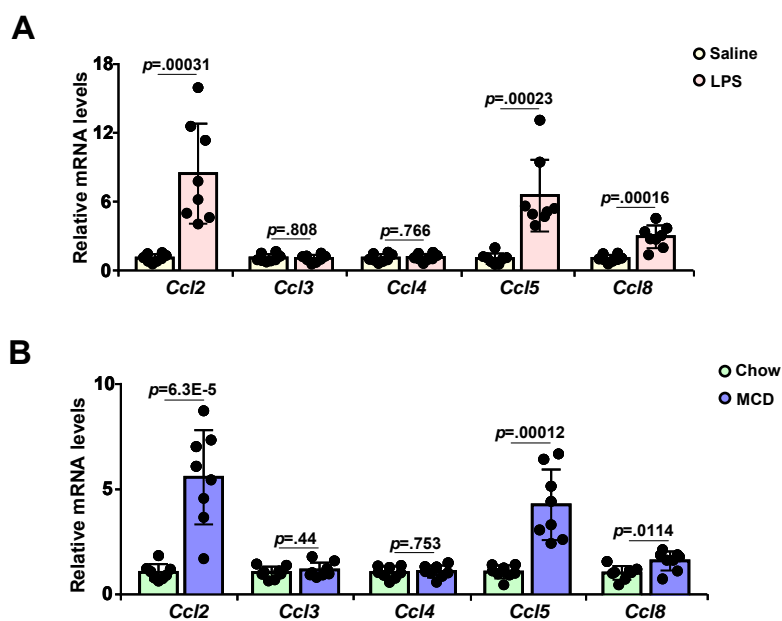

**Fig.S1:** (A) C57/BL6 mice were injected with LPS or saline as described in the Methods. Chemokine expression was examined by qPCR. (B) C57/BL6 mice were fed an MCD diet or a control diet as described in the Methods. Chemokine expression was examined by qPCR.

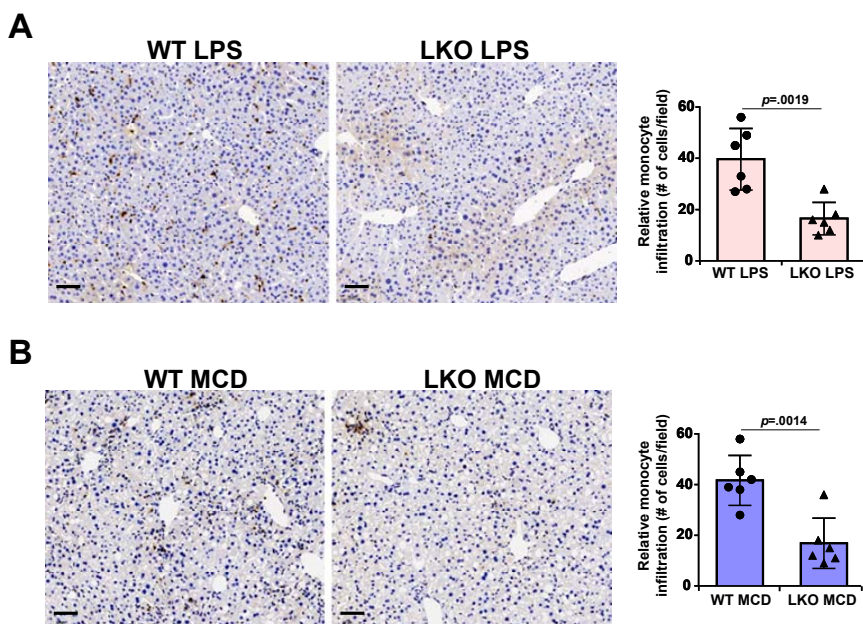

**Fig.S2:** (A) BRG1 conditional knockout (LKO) mice and wild type littermates were injected with LPS for 12h. Monocytes were stained with anti-Ly6C. (B) BRG1 conditional knockout (LKO) mice and wild type littermates were fed an MCD diet for 4 weeks. Monocytes were stained with anti-Ly6C. Scale bar, 50 $\mu$ m.

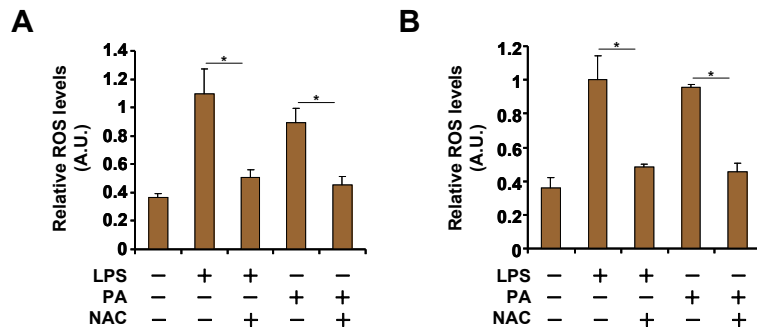

**Fig.S3:** (A) HepG2 cells were treated with LPS or PA in the presence or absence of NAC. ROS levels were examined by a luminescence kit. (B) Primary murine hepatocytes were treated with LPS or PA in the presence or absence of NAC. ROS levels were examined by a luminescence kit.

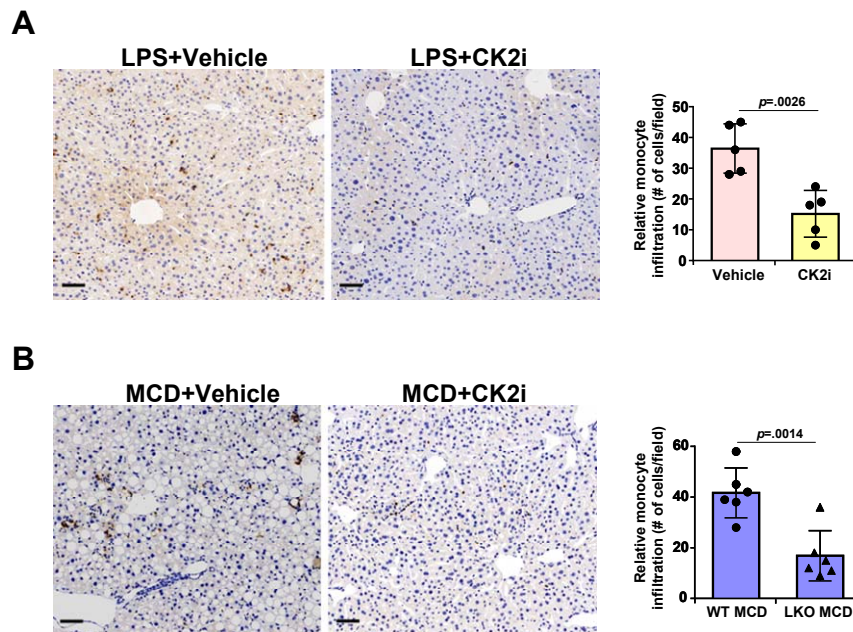

**Fig.S4:** (A) C57/BL6 mice were injected with LPS in the presence or absence of silmitasertib. Monocytes were stained with anti-Ly6C. (B) C57/BL6 mice were fed the MCD diet in the presence or absence of silmitasertib. Monocytes were stained with anti-Ly6C. Scale bar, 50 $\mu$ m.

**Table I: Acute Hepatitis Patient Information Sheet**

| <b>Patient ID</b> | <b>Gender</b> | <b>Age (yr)</b> | <b>BT (°C)</b> | <b>BP (mmHg)</b> | <b>ALT (U/dL)</b> | <b>AST (U/dL)</b> | <b>LDH (U/dL)</b> | <b>Triglyceride (mM)</b> | <b>Cholesterol (mM)</b> |
|-------------------|---------------|-----------------|----------------|------------------|-------------------|-------------------|-------------------|--------------------------|-------------------------|
| 1                 | Female        | 33              | 36.7           | 148/100          | 58.8              | 74.4              | 276               | 2.42                     | 6.41                    |
| 2                 | Male          | 24              | 36.7           | 174/107          | 63.7              | 73.3              | 248               | 5.23                     | 5.39                    |
| 3                 | Male          | 46              | 36.8           | 127/82           | 173.5             | 119.7             | 359               | 2.57                     | 4.13                    |
| 4                 | Female        | 45              | 36.4           | 143/83           | 47                | 62.7              | 288               | 2.46                     | 5.88                    |
| 5                 | Female        | 52              | 36             | 120/80           | 82.5              | 68.1              | 259               | 1.75                     | 5.7                     |
| 6                 | Male          | 28              | 36.5           | 125/75           | 113               | 143.1             | 274               | 2.44                     | 4.59                    |
| 7                 | Female        | 75              | 36.5           | 140/90           | 122.9             | 121.4             | 254               | 2.8                      | 3.93                    |
| 8                 | Male          | 61              | 36.4           | 119/80           | 132.1             | 126.2             | 296               | 2.96                     | 5.98                    |
